# Supplementary material
Source: ML conference proceedings conference paper supplement (https://openreview.net/forum?id=SWDYBzULRk)
Supplement: supplementary_material [file attachment]

## Supplementary Information

**Table 1: Assessment of measures' feasibility and compatibility with open-source weights**

| Category                | #  | Measure                                             | Feasible?         | Compatible with open-source weights? |
|-------------------------|----|-----------------------------------------------------|-------------------|--------------------------------------|
| Responsible Development | 1  | Expanded Dual-Use Review                            | Yes ▾             | Yes ▾                                |
|                         | 2  | Model Licensing for Training or Release             | Some challenges ▾ | Yes ▾                                |
|                         | 3  | Expanded Developer Liability                        | Some challenges ▾ | Yes ▾                                |
|                         | 4  | Voluntary Commitments                               | Yes ▾             | Yes ▾                                |
|                         | 5  | Export Controls                                     | Some challenges ▾ | Yes ▾                                |
|                         | 6  | Publication Norms                                   | Yes ▾             | Yes ▾                                |
| Risk Assessment         | 7  | <b>Model Evaluations for Dangerous Capabilities</b> | Yes ▾             | Yes ▾                                |
|                         | 8  | Red Teaming                                         | Yes ▾             | Yes ▾                                |
|                         | 9  | Monitoring for Misuse                               | Some challenges ▾ | Requires Structured Access ▾         |
| Transparency            | 10 | Impact Statements                                   | Yes ▾             | Yes ▾                                |
|                         | 11 | Information-Sharing with Regulators                 | Yes ▾             | Yes ▾                                |
|                         | 12 | <b>Vulnerability Reporting</b>                      | Yes ▾             | Yes ▾                                |
|                         | 13 | Watermarking                                        | Some challenges ▾ | May be fine-tuned away ▾             |
| Access Management       | 14 | Data Curation                                       | Yes ▾             | Yes ▾                                |
|                         | 15 | Data Use Agreements                                 | Yes ▾             | Yes ▾                                |
|                         | 16 | <b>Structured Access</b>                            | Some challenges ▾ | No ▾                                 |
|                         | 17 | <b>Know Your Customer</b>                           | Some challenges ▾ | Requires Structured Access ▾         |
|                         | 18 | <b>Nucleic Acid Synthesis Screening</b>             | Yes ▾             | Yes ▾                                |
|                         | 19 | Input/Output Filtering                              | Yes ▾             | May be fine-tuned away ▾             |
| Cybersecurity           | 20 | Database Security                                   | Some challenges ▾ | Yes ▾                                |

| Category                | #  | Measure                      | Feasible?         | Compatible with open-source weights? |
|-------------------------|----|------------------------------|-------------------|--------------------------------------|
|                         | 21 | Securing Weights             | Some challenges ▾ | No ▾                                 |
|                         | 22 | Securing Lab Equipment       | Yes ▾             | Yes ▾                                |
| Investing in Resilience | 23 | Model-Sharing Infrastructure | Yes ▾             | Yes ▾                                |
|                         | 24 | Public Compute               | Yes ▾             | Yes ▾                                |
|                         | 25 | Fund Countermeasures         | Yes ▾             | Yes ▾                                |

### Discussion: The decentralized and non-commercial nature of BDT development makes it harder to implement and target regulation

Unlike frontier foundation models, a wide variety of BDTs are developed by a range of actors across the world, often in not particularly well-resourced academic or start-up labs. This decentralization makes it much more difficult to implement regulatory proposals that may be appropriate when dealing with only a few large technology companies. In particular,

- **It is harder to target regulation in a proportionate way:** the breadth of different BDTs means that it is not easy to delineate which tools pose the most risk. This increases the likelihood that regulation has the unintended effect of slowing down beneficial science. While this is also an issue for other types of AI, the lack of effective compute governance options makes this more concerning.
- **It is more difficult to track compliance:** with more actors involved, any hypothetical regulator would have to spend more time and money ensuring that developers are following the rules. This concern is compounded by the fact that a malicious actor will try and conceal evidence of misuse. In contrast, with only a few companies capable of developing a foundation model at the level of GPT-4, it is straightforward for regulators to identify those companies whose models might pose risks.
- **There is a greater risk of regulatory arbitrage:** with BDT development spread across the world, many different countries may need to harmonize their legislation to effectively mitigate risks. This is also true for non-biology AI, to an extent, but the overwhelming concentration of frontier foundation model development in the US has meant that it is less of an immediate concern.
- **It is harder to consult all model developers to develop best practice:** in contrast with the White House Voluntary Commitments, which initially applied to only seven advanced AI companies ([White House, 2023](#)), developing best practices for BDT development is likely to be slower and more difficult. Academic conferences and partnerships like RosettaCommons will be key to developing such best practices.

Moreover, that many BDT developers lack the resources of large technology companies means that they cannot as easily implement potentially crucial cybersecurity features, both through lack of funding and expertise. We explicitly provide cybersecurity recommendations in Section 4.5, several of which will likely require developers and governments to work closely together.
